# Supplementary material for: Brassica napus Roots Use Different Strategies to Respond to Warm Temperatures
Source: MDPI journal article supplement (doi:10.3390/ijms24021143), 2023-01-06
Supplement: s1 [file s1]

A

Extent traits

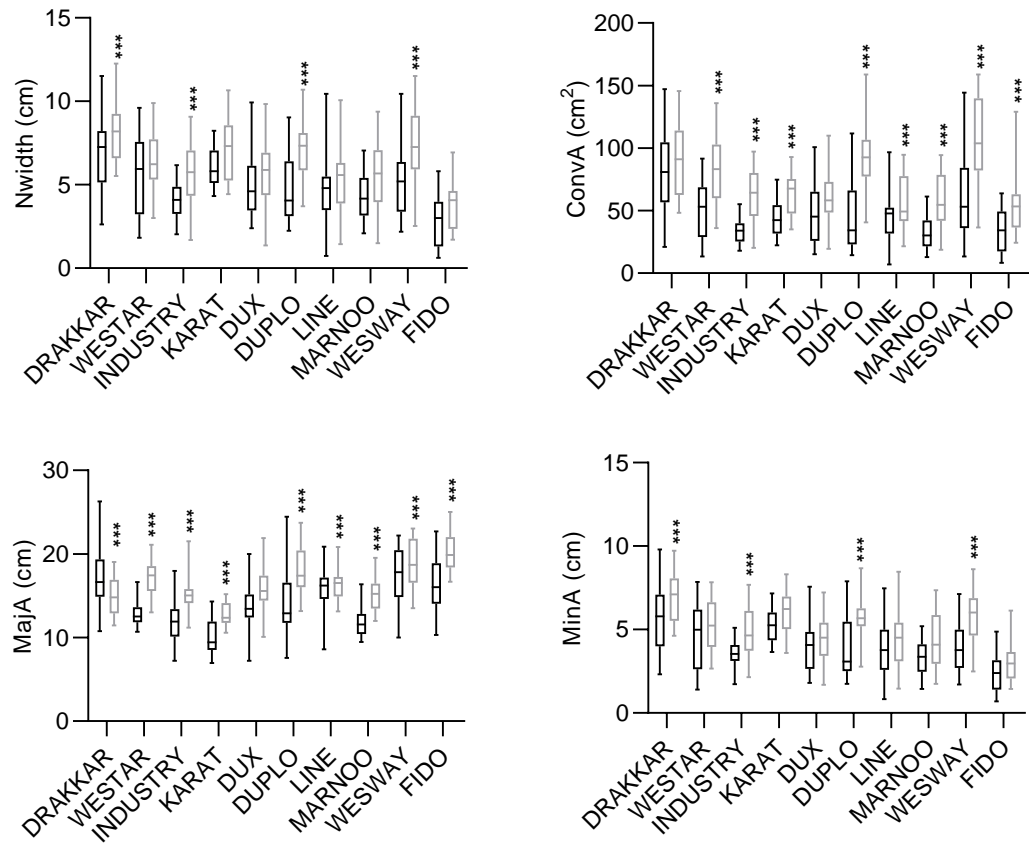

B

Size traits

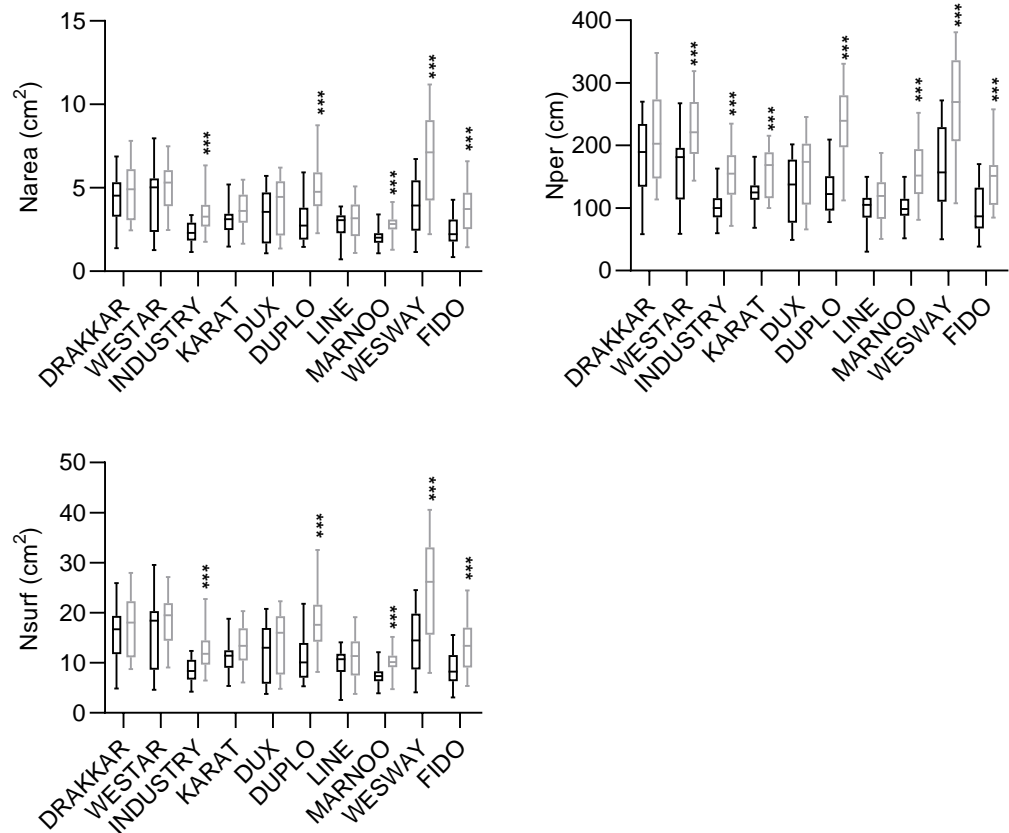

C

Distribution traits

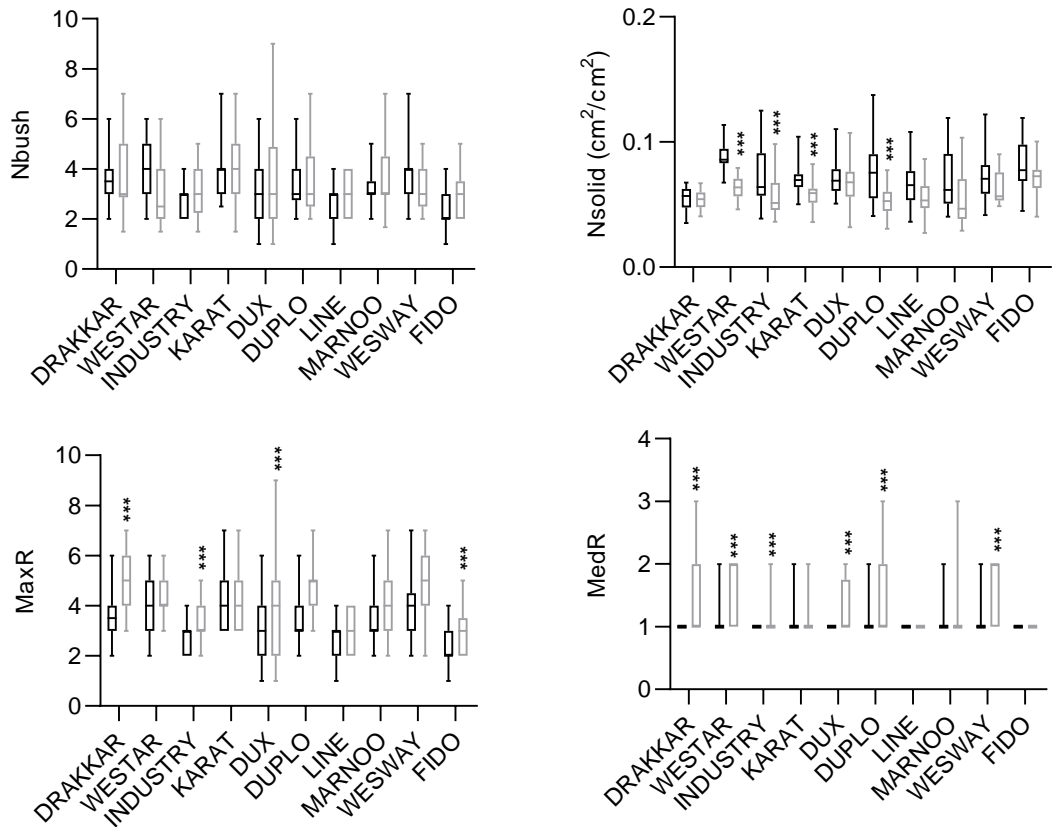

D

Secondary roots traits

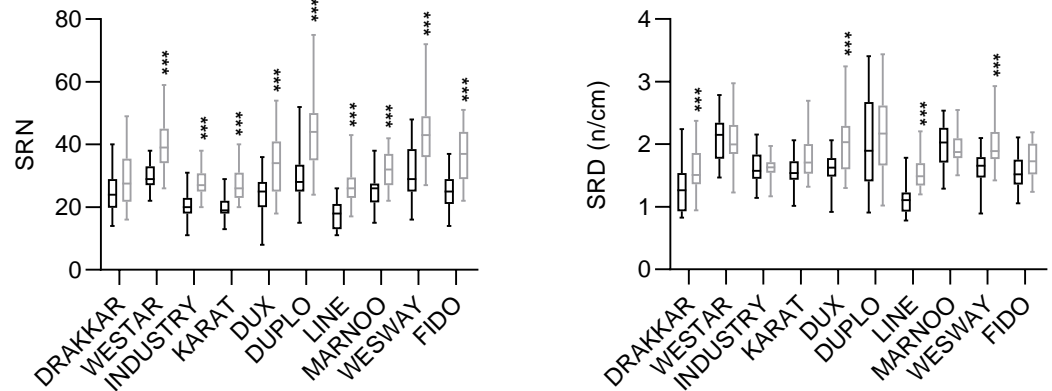

E

Shape traits

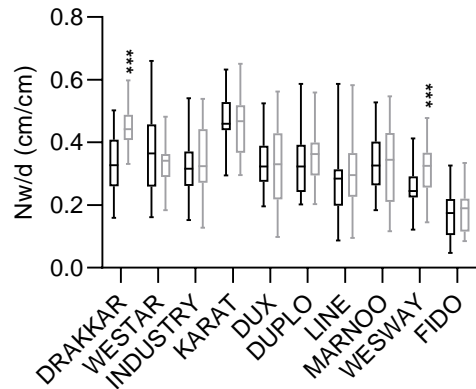

**Figure S1.** Warm conditions provoke extensive changes in all major root traits in *B. napus*. Comparative values of root extent-related traits **(A)**, size-related traits **(B)**, distribution-related traits **(C)**, secondary roots traits **(D)** and shape-related traits **(E)** of a collection of 10 SOSR genotypes grown at 21°C or 29°C. Statistical t-test analysis, \*\*\* FDR<0.01.
