# Supplementary material for: Brassica napus Roots Use Different Strategies to Respond to Warm Temperatures
Source: MDPI journal article supplement (doi:10.3390/ijms24021143), 2023-01-06
Supplement: s1 [file s1]

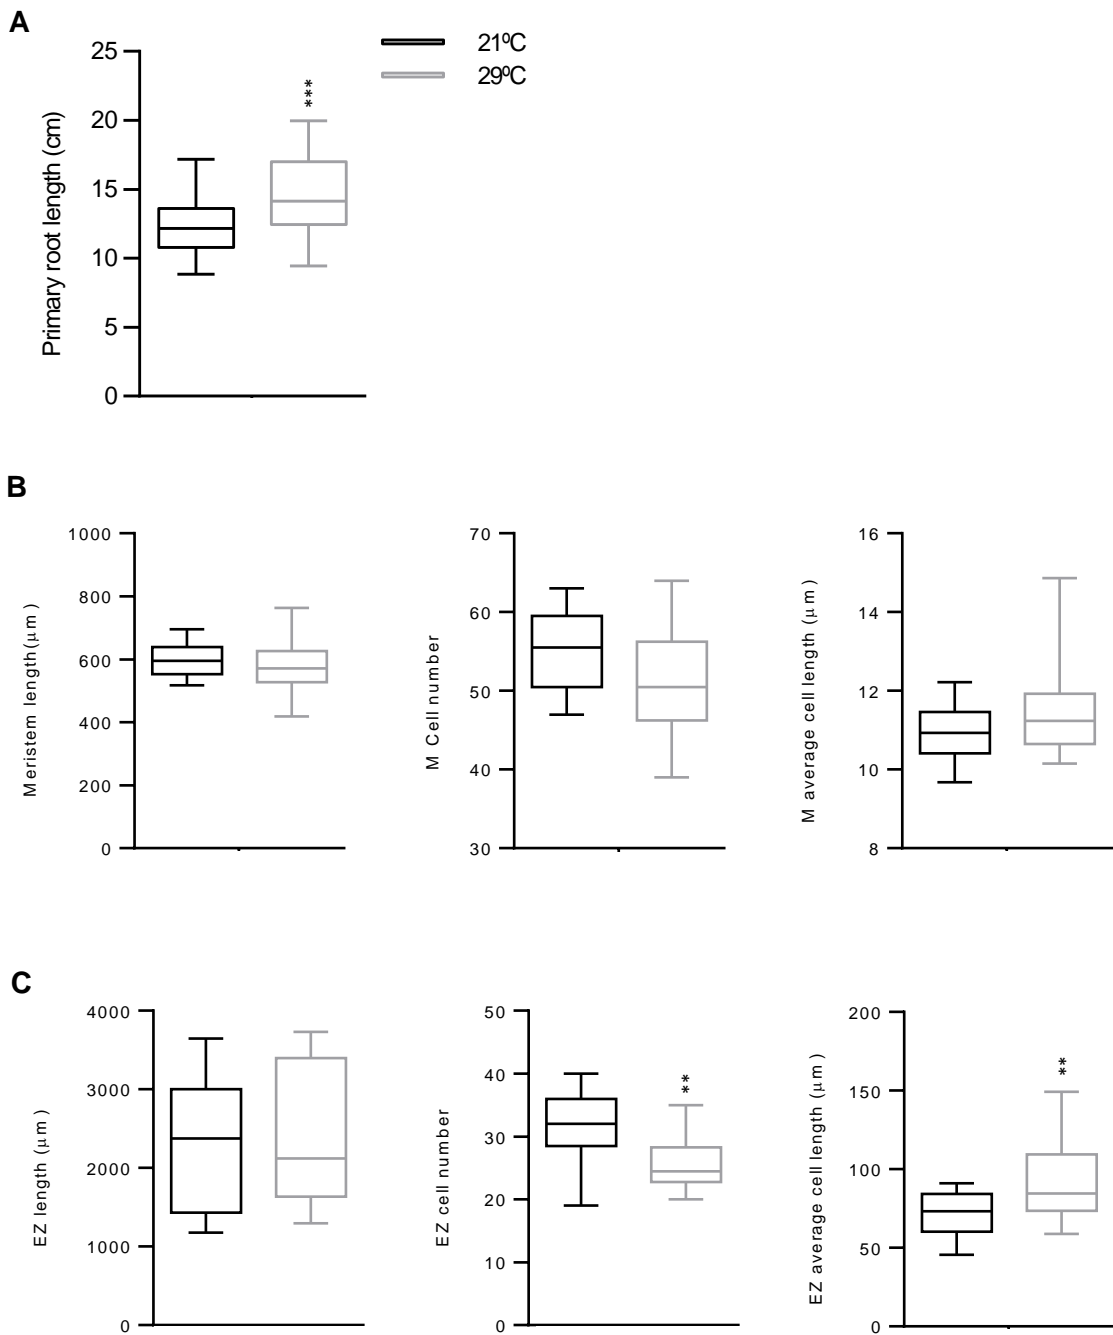

**Figure S2.** Cellular response of Marnoo primary root to warm temperatures. **(A)** Primary root length of Marnoo seedlings grown 7 days at 21°C and 29°C. Statistical t-test analysis, \*\*\* $p < 0.0001$ . **(B)** Meristem length, cell number and average cell length of cells in the meristematic zone of Mar-noo grown at 21°C and 29°C. Statistical t-test analysis found no significant differences. **(C)** Elongation zone length, cell number and average cell length of cells in the elongation zone of Marnoo grown at 21°C and 29°C. Statistical t-test analysis, \*\*  $p < 0.001$ .
